# Supplementary material for: Improved Physicochemical Properties of Yogurt Fortified with Fish Oil/γ-Oryzanol by Nanoemulsion Technology
Source: MDPI journal article supplement (doi:10.3390/molecules23010056), 2018-01-02
Supplement: s1 [file s1]

# Improved Physicochemical Properties of Yogurt Fortified with Fish Oil/ $\gamma$ -oryzanol by Nanoemulsion Technology

Jinfeng Zhong, Rong Yang, Xiaoyi Cao, Xiong Liu and Xiaoli Qin\*

College of Food Science, Southwest University, Chongqing 400715, P. R. China

\* Correspondence: qinxl@swu.edu.cn; Tel.&Fax:+86-023-68251298

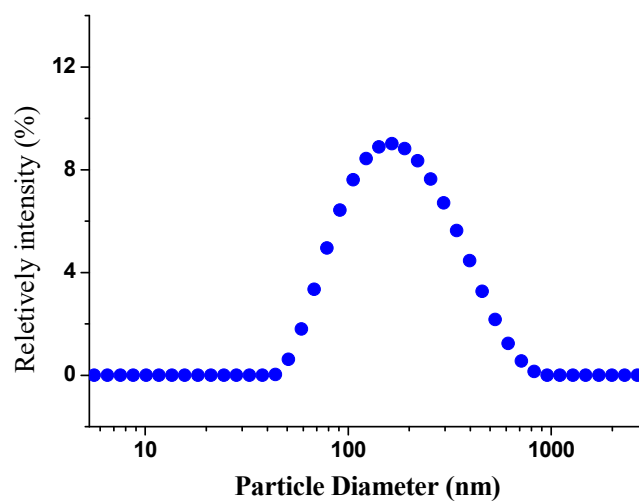

**Figure. S1** Particle size distribution of fish oil/ $\gamma$ -oryzanol nanoemulsion
